# Supplementary material
Source: MDPI journal article supplement (https://www.mdpi.com/2073-4344/8/8/328)

Supplementary figures list:

Figure S1. CV curve of the NiFe sample at 100 °C

Figure S2. RDE curves of 0.125 and 0.25 mg cm<sup>-2</sup> loadings of NiFe samples calcined at different temperature in 0.1 M KOH with 5 mV s<sup>-1</sup> at different rotation rates (400-2500 rpm)

Figure S3. Electrochemical stability of Ni Fe oxide calcined at different temperature with three different mass loadings

Figure S4. Raman spectra of the different samples a) 100-250 °C; b) 450-600 °C

Figure S5. The relationship between number of electron transfer per oxygen molecule vs. potentials at different loading

Figure S6. XPS peak de-convolution of Ni2p (a), and O1s (b)

Table S1. Relative intensities of XPS components in O1s and Ni2p spectra

Supplementary figures:

Figure S1. CV curve of the NiFe sample at 100 °C

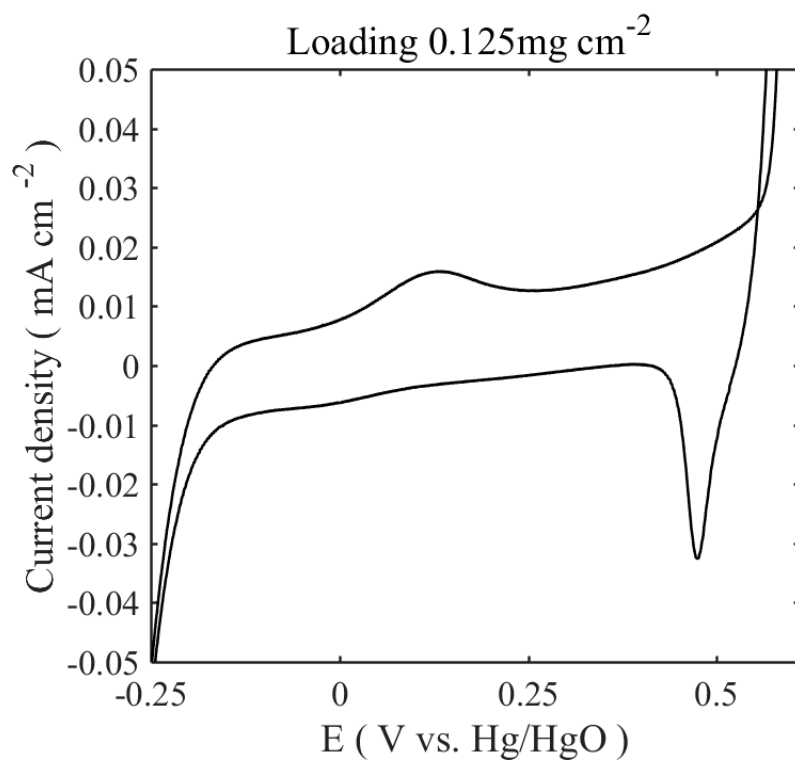

Figure S2. RDE curves of  $0.125$  and  $0.25 \text{ mg cm}^{-2}$  loadings of NiFe samples calcined at different temperature in  $0.1 \text{ M KOH}$  with  $5 \text{ mV s}^{-1}$  at different rotation rates ( $400$ - $2500 \text{ rpm}$ )

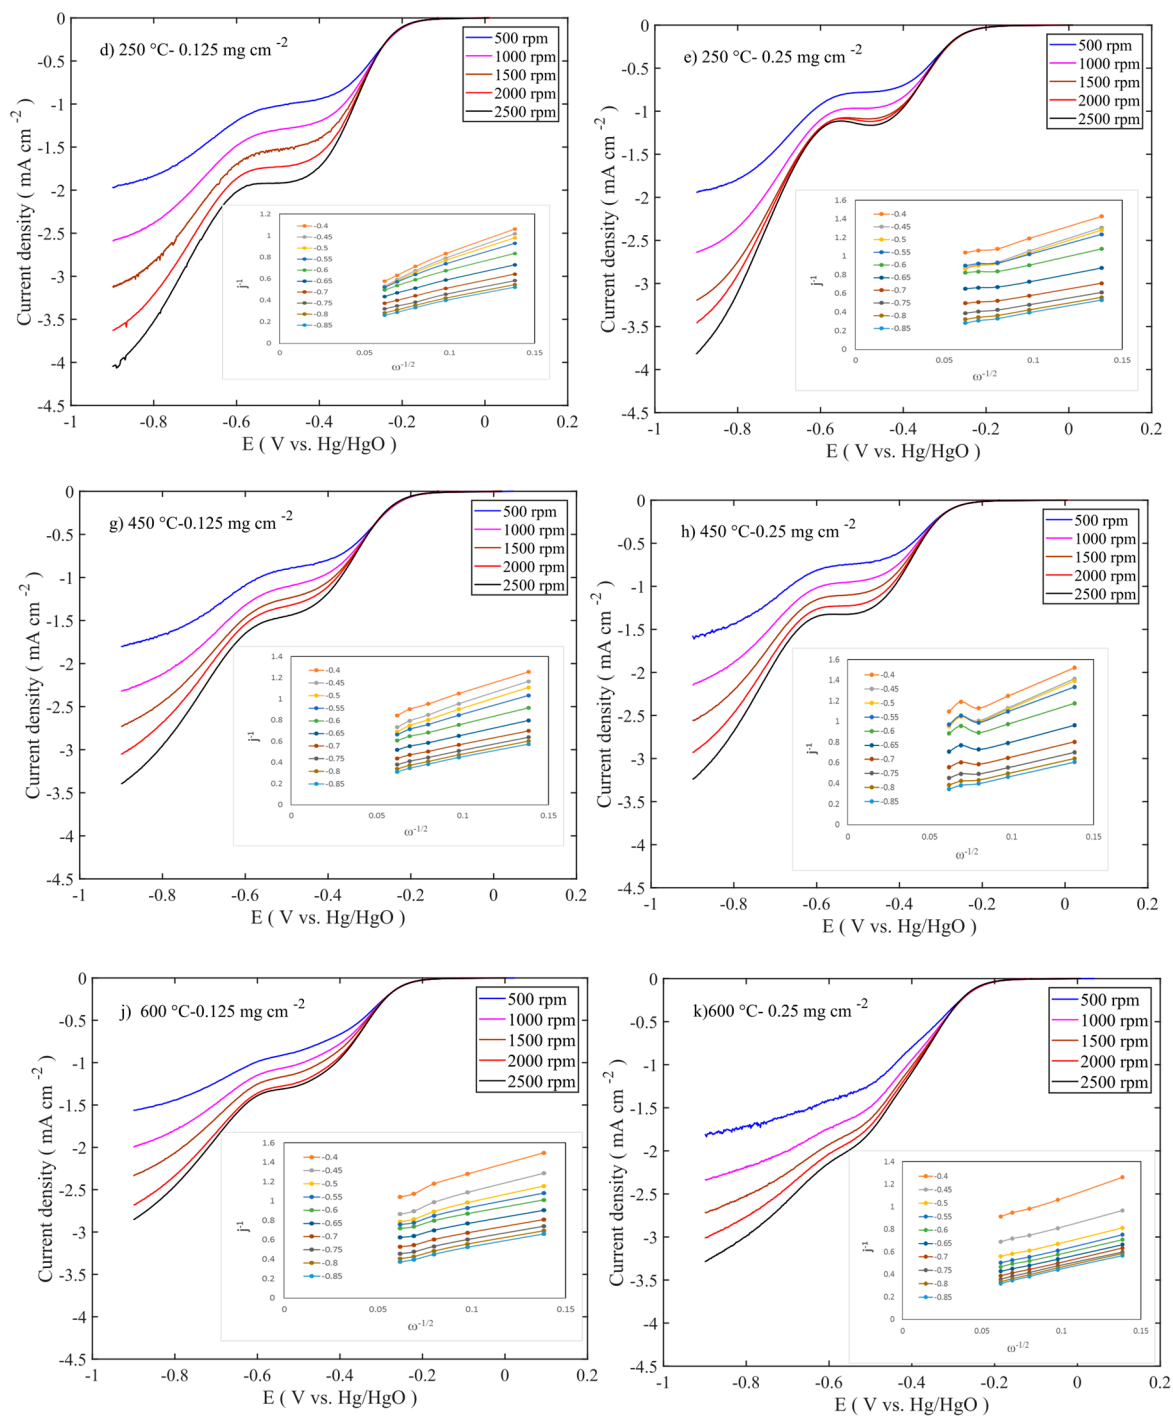

Figure S3. Electrochemical stability of Ni Fe oxide calcined at different temperature with three different mass loadings

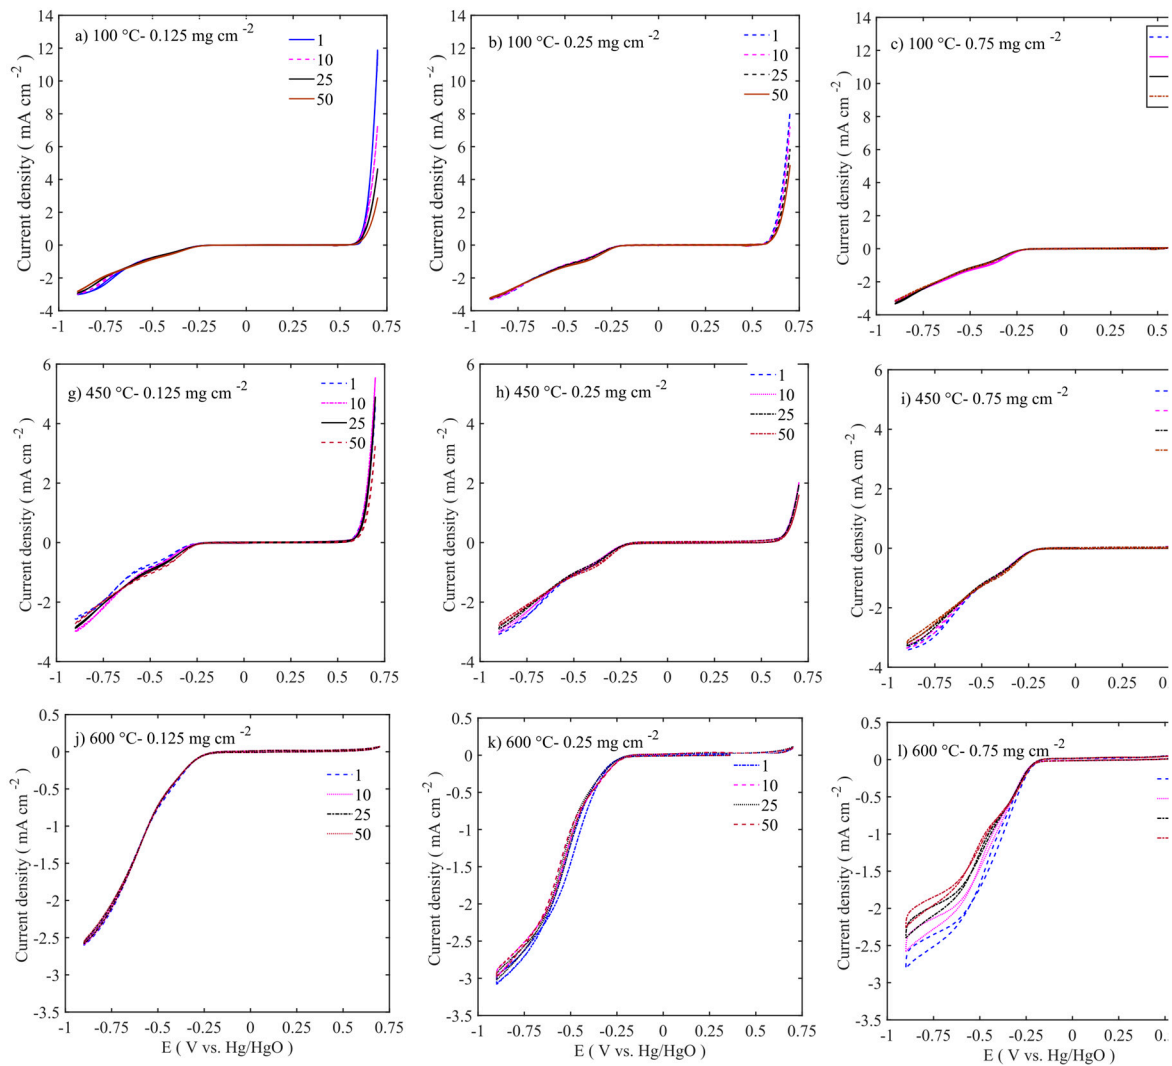

Figure S4. Raman spectra of the different samples a) 100-250 °C; b) 450-600 °C

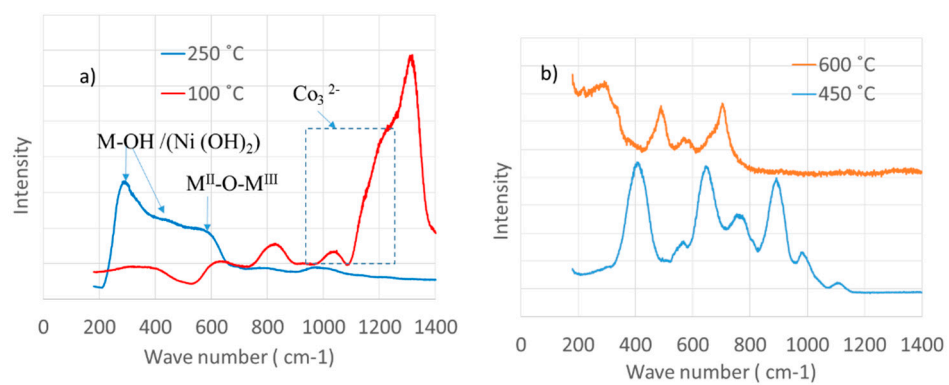

Figure S5.Relationship between number of electron trasferd per oxygen molecule vs. potentials at different loading

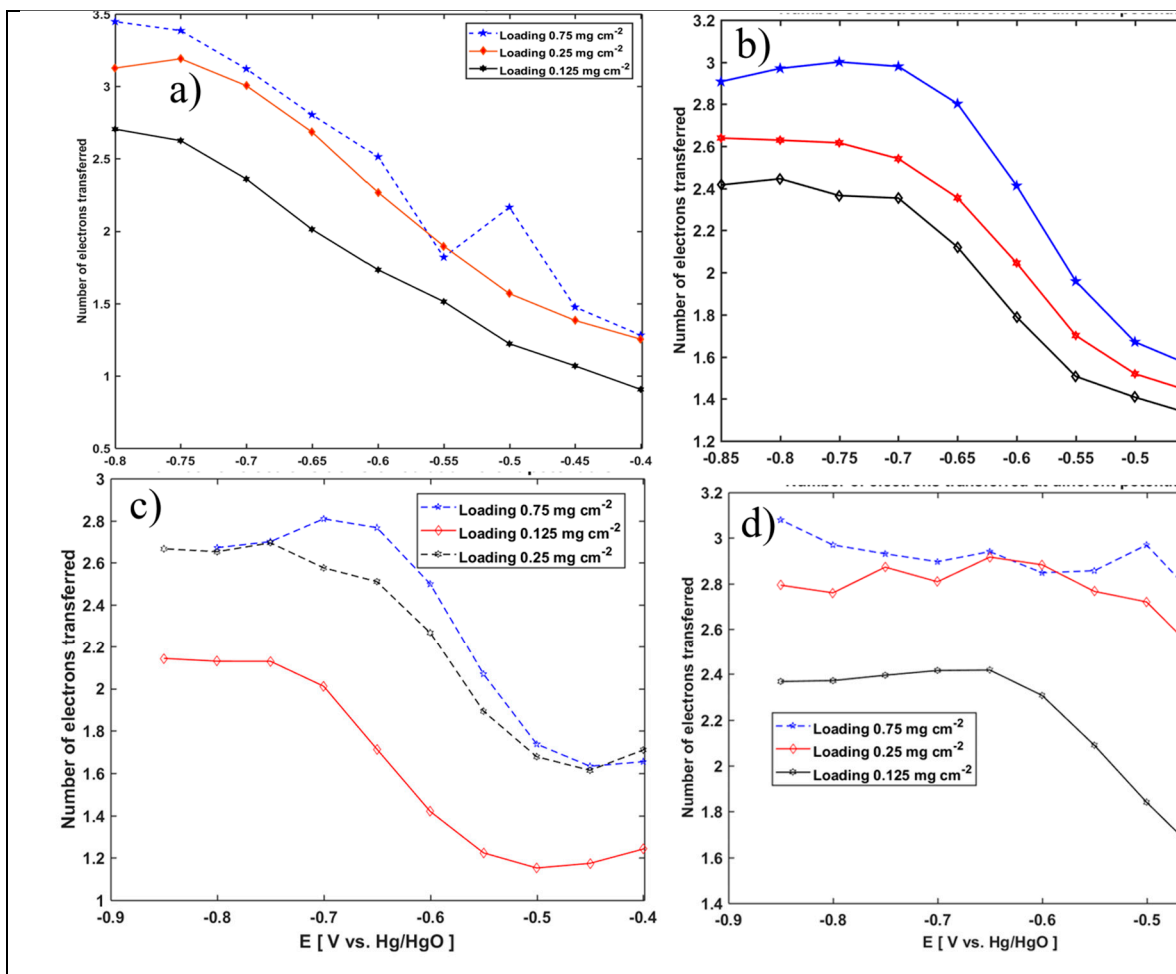

XPS fitting method:

We used Voigt functions within the fit-XPS software to numerically fit the XPS-spectra. For Ni2p we used three components representing  $\text{Ni}^{2+}$ ,  $\text{Ni}^{3+}$  and a satellite peak, as indicated in the Figure. S1. For the 250 °C spectrum we could not separate the  $\text{Ni}^{2+}$  and  $\text{Ni}^{3+}$  peaks properly

and used only one broader peak. For O1s we used three different components, representing O in metal oxide ( $\text{NiFe}_2\text{O}_4$ ), OH and  $\text{H}_2\text{O}$ . The water and OH components are not only from the sample, but have also atmospheric contributions from water adsorption in the air.

Table S1. Relative intensities of XPS components in O1s and Ni2p spectra

|                      | 100 °C | 250 °C | 400 °C | 600 °C |
|----------------------|--------|--------|--------|--------|
| $\text{Ni}^{2+}$     | 58%    | --     | 71%    | 89%    |
| $\text{Ni}^{3+}$     | 42%    | --     | 29%    | 11%    |
|                      |        |        |        |        |
| Metal oxide          | 49%    | 24%    | 28%    | 88%    |
| OH-                  | 25%    | 39%    | 63%    | 10%    |
| $\text{H}_2\text{O}$ | 26%    | 37%    | 9%     | 2%     |

Table S1. Relative intensities of XPS components in O1s and Ni2p spectra

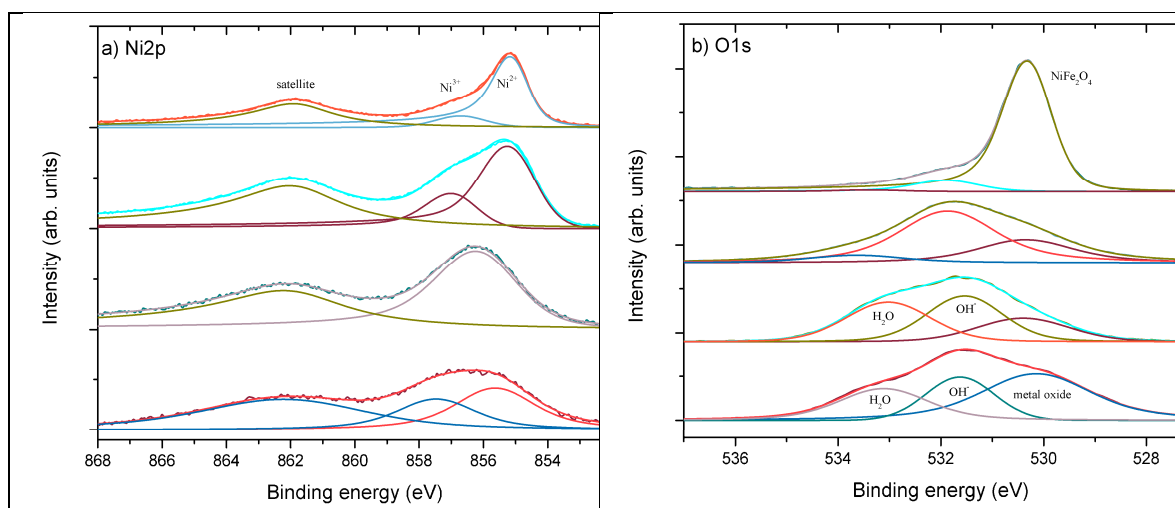

Supplement: s1 [file s1]
